# Supplementary material
Source: MDPI journal article supplement (https://www.mdpi.com/2226-471X/8/2/120)
Supplement: s1 [file s1 › languages-2084826-supplementary.pdf]

## Supplementary Materials

**Table S1.** Demographic characteristics and stroke variables of PwA.

| Participants | Gender | Age | Years of Education | Localization of Stroke                                              | Type of Stroke | Stage of Recovery | Time Post-Stroke in Months | Dysarthria /Apraxia | Aphasia Severity |
|--------------|--------|-----|--------------------|---------------------------------------------------------------------|----------------|-------------------|----------------------------|---------------------|------------------|
| 1            | M      | 50  | 14                 | supply area on the left ACM                                         | ischemic       | acute             | 3                          | -                   | mild             |
| 2            | M      | 63  | 11                 | cortical hypodensity TP                                             | ischemic       | acute             | 1                          | -                   | mild             |
| 3            | M      | 56  | 11                 | frontally in the area of the frontal operculum and precentral gyrus | hemorrhagic    | acute             | 1                          | -                   | mild             |
| 4            | M      | 39  | 12                 | anterior part of insula, frontal operculum                          | ischemic       | acute             | 0                          | -                   | mild             |
| 5            | F      | 64  | 8                  | frontal cortico subcortical                                         | ischemic       | acute             | 3                          | dysarthria          | mild             |
| 6            | M      | 52  | 16                 | frontal and frontoparietal                                          | ischemic       | acute             | 1                          | -                   | mild             |
| 7            | M      | 56  | 12                 | subtotal occlusion of the left ACI                                  | ischemic       | acute             | 2                          | -                   | mild             |
| 8            | F      | 23  | 14                 | AVM frontal                                                         | hemorrhagic    | acute             | 2                          | -                   | mild             |
| 9            | M      | 59  | 11                 | temporal                                                            | ischemic       | acute             | 1                          | -                   | mild             |
| 10           | M      | 57  | 16                 | parietal                                                            | ischemic       | acute             | 0                          | dysarthria          | mild             |
| 11           | M      | 55  | 12                 | temporoparietal cortico/subcortical                                 | ischemic       | acute             | 0                          | dysarthria          | mild             |
| 12           | M      | 68  | 11                 | ischemic changes and occlusion of the left ACM                      | ischemic       | acute             | 0                          | -                   | mild             |
| 13           | F      | 23  | 16                 | AVM frontal                                                         | hemorrhagic    | acute             | 0                          | -                   | mild             |
| 14           | F      | 88  | 12                 | frontal opercular                                                   | ischemic       | acute             | 1                          | apraxia             | moderate         |

|    |   |    |    |                                                                                                   |             |         |    |                    |          |
|----|---|----|----|---------------------------------------------------------------------------------------------------|-------------|---------|----|--------------------|----------|
| 15 | F | 61 | 12 | insular, occlusion of the left ACI and subtotal stenosis of the ACI with embolism of the left ACM | ischemic    | acute   | 2  | -                  | mild     |
| 16 | M | 42 | 12 | frontal on higher cortico/subcortical sections                                                    | ischemic    | acute   | 2  | -                  | mild     |
| 17 | F | 77 | 12 | temporoparietal cortico/subcortical                                                               | ischemic    | acute   | 1  | apraxia            | moderate |
| 18 | M | 65 | 12 | ACM supply area (insula, superior temporal gyrus, frontal operculum and basal ganglia)            | ischemic    | acute   | 1  | -                  | moderate |
| 19 | M | 42 | 16 | frontotemporal and parietooccipital and in the area of the thalamus                               | ischemic    | acute   | 3  | apraxia            | mild     |
| 20 | M | 67 | 14 | parietooccipital                                                                                  | ischemic    | chronic | 10 | -                  | mild     |
| 21 | M | 63 | 12 | basal ganglia                                                                                     | hemorrhagic | chronic | 8  | -                  | mild     |
| 22 | M | 46 | 16 | supply area on the left ACM                                                                       | hemorrhagic | chronic | 9  | apraxia            | moderate |
| 23 | M | 74 | 16 | supply area on the left ACM                                                                       | ischemic    | chronic | 9  | -                  | moderate |
| 24 | M | 35 | 16 | FT with ventricular penetration                                                                   | hemorrhagic | chronic | 6  | -                  | mild     |
| 25 | F | 43 | 12 | supply area on the left ACM                                                                       | ischemic    | chronic | 79 | apraxia            | mild     |
| 26 | F | 70 | 16 | frontoparietal                                                                                    | ischemic    | chronic | 44 | apraxia            | moderate |
| 27 | M | 73 | 12 | parietooccipital                                                                                  | ischemic    | chronic | 11 | -                  | moderate |
| 28 | F | 59 | 11 | Ischemia after operative treatment of ACI stenosis                                                | ischemic    | chronic | 12 | dysarthria/apraxia | moderate |
| 29 | M | 56 | 11 | supply area on the left ACM                                                                       | ischemic    | chronic | 5  | -                  | moderate |
| 30 | M | 86 | 12 | insular sulcus                                                                                    | ischemic    | chronic | 18 | apraxia            | moderate |
| 31 | F | 46 | 16 | supply area on the left ACM                                                                       | ischemic    | chronic | 15 | apraxia            | moderate |

|    |   |    |    |                                                                                                             |             |         |    |            |          |
|----|---|----|----|-------------------------------------------------------------------------------------------------------------|-------------|---------|----|------------|----------|
| 32 | M | 68 | 12 | frontotemporoparietal                                                                                       | ischemic    | chronic | 9  | apraxia    | mild     |
| 33 | F | 57 | 16 | ICH frontal, in basal ganglia and temporal and left frontal smaller SAH                                     | hemorrhagic | chronic | 72 | -          | mild     |
| 34 | M | 84 | 16 | supply area on the left ACM                                                                                 | ischemic    | chronic | 60 | dysarthria | mild     |
| 35 | M | 60 | 12 | supply area on the left ACM                                                                                 | ischemic    | chronic | 6  | dysarthria | moderate |
| 36 | M | 40 | 12 | supply area on the left ACM                                                                                 | ischemic    | chronic | 20 | -          | moderate |
| 37 | M | 50 | 12 | supply area on the left ACM                                                                                 | ischemic    | chronic | 9  | -          | moderate |
| 38 | F | 32 | 12 | the postero-caudal part of the insular cortex, and at the transition from the temporal to the parietal lobe | ischemic    | chronic | 6  | -          | mild     |

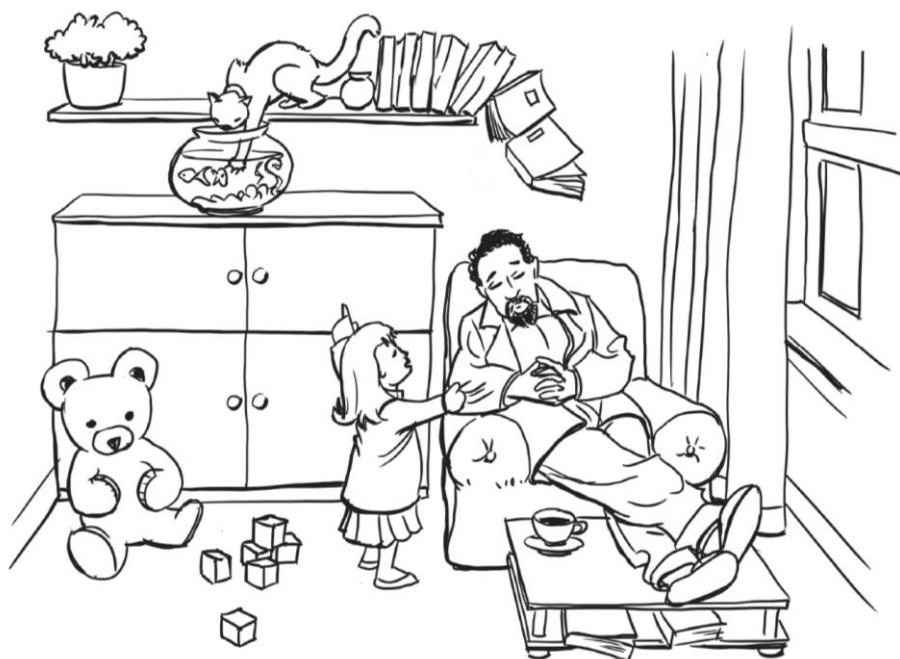

**Figure S1.** Picture from the Croatian version of the Comprehensive Aphasia Test (CAT-HR, Swinburn et al. 2020; published with the permission of Naklada Slap).

**Table S2.** Content units and main concepts produced by healthy speakers (HS).

|     | <i>All Produced Concepts</i>                                                                                                               | <i>Total<br/>(in %)</i> | <i>Main Concepts<br/>&gt;30%</i> |
|-----|--------------------------------------------------------------------------------------------------------------------------------------------|-------------------------|----------------------------------|
| 1   | Descriptive: The action takes place in the kitchen/room/living room/house + naming the characters                                          | 21                      |                                  |
| 2.  | There are toys/a teddy bear/blocks in the corner/on the floor.                                                                             | 34.21                   | MC1                              |
| 3.  | Little girl plays with toys, a teddy bear and blocks.                                                                                      | 31.58                   | MC2                              |
| 4.  | Little girl stopped playing/stopped the game.                                                                                              | 5                       |                                  |
| 5.  | Father is sleeping.                                                                                                                        | 63.16                   | MC3                              |
| 6.  | Father is tired/he is tired.                                                                                                               | 2.5                     |                                  |
| 7.  | Father is sitting/lying/leaning back/resting in the armchair.                                                                              | 39.47                   | MC4                              |
| 8.  | Father keeps his feet on the table/ raises his feet on the table.                                                                          | 29                      |                                  |
| 9.  | Father drinks coffee/drank coffee/won't have time to drink coffee/has drunk a half of coffee.                                              | 26                      |                                  |
| 10. | Father/little girl cooked/prepared coffee/tea.                                                                                             | 8                       |                                  |
| 11. | Coffee/tea is on the table.                                                                                                                | 26                      |                                  |
| 12. | There are books/ newspapers under the table.                                                                                               | 10.5                    |                                  |
| 13. | Curtains are open.                                                                                                                         | 5                       |                                  |
| 14. | Little girl stands next to (grand)father/little girl looks after (grand)father/stands next to the armchair/stands next to (grand)father    | 24                      |                                  |
| 15. | Little girl/granddaughter/daughter shows her father/warns/indicates/informs/explains/speaks/addresses/asks for/calls/begs/wants attention. | 71.05                   | MC5                              |
| 16. | The girl noticed.                                                                                                                          | 8                       |                                  |
| 17. | Little girl/granddaughter/daughter is pulling/pulls her father's sleeve/wakes the father up.                                               | 60.53                   | MC6                              |
| 18. | Cat climbed/jumped/stood/went on the wardrobe/shelf/dresser.                                                                               | 31.58                   | MC7                              |
| 19. | Cat entered the room.                                                                                                                      | 2.5                     |                                  |

|     |                                                                                                                 |       |     |
|-----|-----------------------------------------------------------------------------------------------------------------|-------|-----|
| 20. | The cat hunts/eats/tries/wants/wants to catch/eat/grabs/catch/get/steal fish from the aquarium/in the aquarium. | 89.47 | MC8 |
| 22. | Books fall (on the father's head, on the floor), the books will hit the father.                                 | 29    |     |
| 22. | The cat knocks down/throws/has knocked down/has knocked down/scatters/has scattered the books.                  | 50    | MC9 |
| 23. | The cat makes a mess.                                                                                           | 8     |     |
| 24. | Description of the space (there are shelves, a wardrobe, a sideboard,...).                                      | 21    |     |
| 25. | The father should prevent (it).                                                                                 | 10.5  |     |
| 26. | The father does not wake up, the father will wake up.                                                           | 10.5  |     |
| 27. | (Grand)father gets up and walks.                                                                                | 5     |     |
| 28. | (Grand)father looks after his granddaughter.                                                                    | 2.5   |     |
| 29. | The bear is sitting.                                                                                            | 5     |     |

Table S3. Examples of main concept codes produced by PwA.

| Main Concepts | Target                                                                                                                                     | Inaccurate/<br>Incomplete                                                               | Inaccurate/<br>Complete                                                                   | Accurate/<br>Incomplete                                          | Accurate/<br>Complete                                                                                 |
|---------------|--------------------------------------------------------------------------------------------------------------------------------------------|-----------------------------------------------------------------------------------------|-------------------------------------------------------------------------------------------|------------------------------------------------------------------|-------------------------------------------------------------------------------------------------------|
| MC1           | There are toys/a teddy bear/blocks in the corner/on the floor.                                                                             | <i>Imala je još jednu medu i kocke.<br/>She had one more bear and blocks.</i>           | -                                                                                         | <i>Tu su kockice.<br/>Here are blocks.</i>                       | <i>Dolje igračke stoje na podu.<br/>Downstairs, the toys are on the floor.</i>                        |
| MC2           | Little girl was playing with toys, a teddy bear and blocks.                                                                                | <i>Djeca medu...razdvaja kockice.<br/>Children teddy bear ... separates the blocks.</i> | <i>Igraju se igračkom.<br/>They are playing with a toy.</i>                               | <i>Igra se djevojčica.<br/>A girl is playing.</i>                | <i>Ona se igra sa kockicama i medom.<br/>She plays with blocks [phoneme omission] and teddy bear.</i> |
| MC3           | Father is sleeping.                                                                                                                        | -                                                                                       | <i>Djevojčica je zaspala na fotelji.<br/>The little girl fell asleep on the armchair.</i> | <i>Spava u fotelji.<br/>Sleeps in the armchair.</i>              | <i>Gospodin spava.<br/>The gentleman is sleeping.</i>                                                 |
| MC4           | Father is sitting/lying/leaning back/resting in the armchair.                                                                              | <i>Ovo je fino položeno.<br/>This is well laid out.</i>                                 | <i>Muškarac sjedi na klupi.<br/>A man is sitting on a bench.</i>                          | <i>Čovjek leži.<br/>The man is lying down.</i>                   | -                                                                                                     |
| MC5           | Little girl/granddaughter/daughter shows her father/warns/indicates/informs/explains/speaks/addresses/asks for/calls/begs/wants attention. | <i>Zanovijeta.<br/>(She is) nagging.</i>                                                | <i>Dijete oće nešto od njega.<br/>The child wants something from him.</i>                 | <i>Curica pokazuje na mačku.<br/>The girl points to the cat.</i> | <i>Ona bi htjela njemu pokazati.<br/>She would like to show him.</i>                                  |

|     |                                                                                                                |                                                                                        |                                                                                                                                   |                                                                                                   |                                                                                                                            |
|-----|----------------------------------------------------------------------------------------------------------------|----------------------------------------------------------------------------------------|-----------------------------------------------------------------------------------------------------------------------------------|---------------------------------------------------------------------------------------------------|----------------------------------------------------------------------------------------------------------------------------|
| MC6 | Little girl/granddaughter/daughter is pulling/pulls her father's sleeve/wakes the father up.                   | <i>Ovaj da učenik ne spava.</i><br><i>This one, so that the student doesn't sleep.</i> | <i>Djevojčica ga drži za ruku.</i><br><i>"The little girl is holding his hand."</i>                                               | <i>I vuče kćer, sigurno, za rukav.</i><br><i>And the daughter pulls, for sure, by the sleeve.</i> | <i>Curica ga budi.</i><br><i>The girl wakes him up.</i>                                                                    |
| MC7 | The cat climbed/jumped/stood/went on the wardrobe/shelf/dresser.                                               | <i>Gore de je mačak.</i><br><i>Up where the cat is.</i>                                | -                                                                                                                                 | -                                                                                                 | <i>I mačak je na vrhu polica.</i><br><i>And the cat is on top of the shelves.</i>                                          |
| MC8 | The cat hunts/eats/tries/wants/wants to catch/eat/grab/catch/get/steal fish from the aquarium/in the aquarium. | <i>Mačka je ribe nosila.</i><br><i>The cat carried the fish.</i>                       | -                                                                                                                                 | <i>Mačak lovi ribice.</i><br><i>The cat catches fish.</i>                                         | <i>Sad vidim, mačka ribe hvata po ekva, akvariju.</i><br><i>Now I see, the cat is catching fish in the aqu...aquarium.</i> |
| MC9 | The cat knocks down/throws/has knocked down/has knocked down/scatters/has scattered the books.                 | <i>Mačka tura.</i><br><i>The cat pushes.</i>                                           | <i>Mačka kad je hvatala ptice tak je gurnula kišobran.</i><br><i>When the cat was catching the birds, it pushed the umbrella.</i> | <i>Knjige tu bacio.</i><br><i>Threw the books here.</i>                                           | <i>... i da (mačka) ruši knjige.</i><br><i>... and that (the cat) is knocking down books.</i>                              |

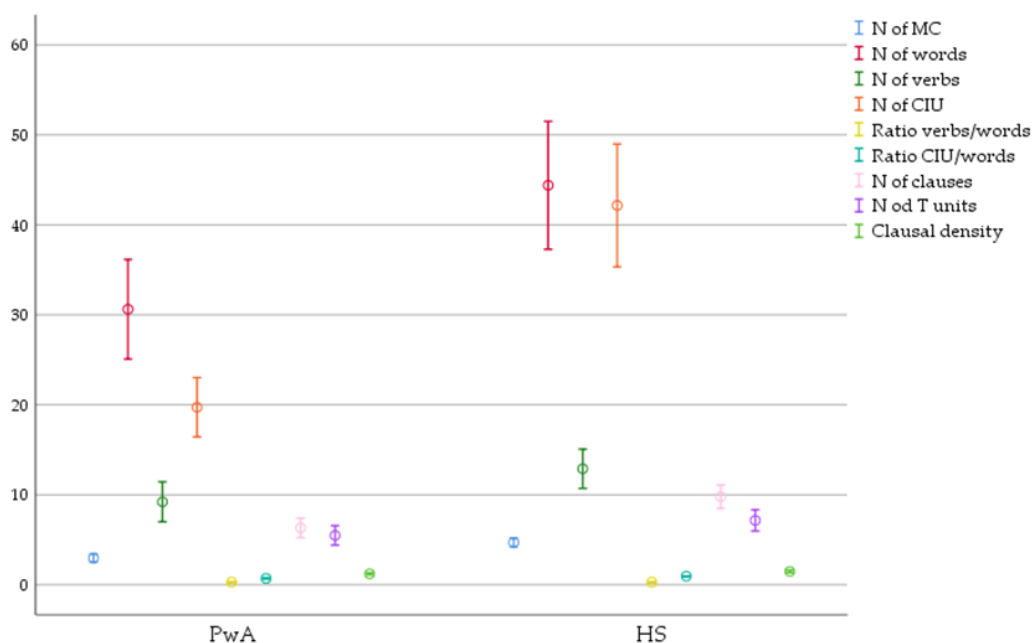

Figure S2. Error bars that represent means and standard deviations of the entire data set.

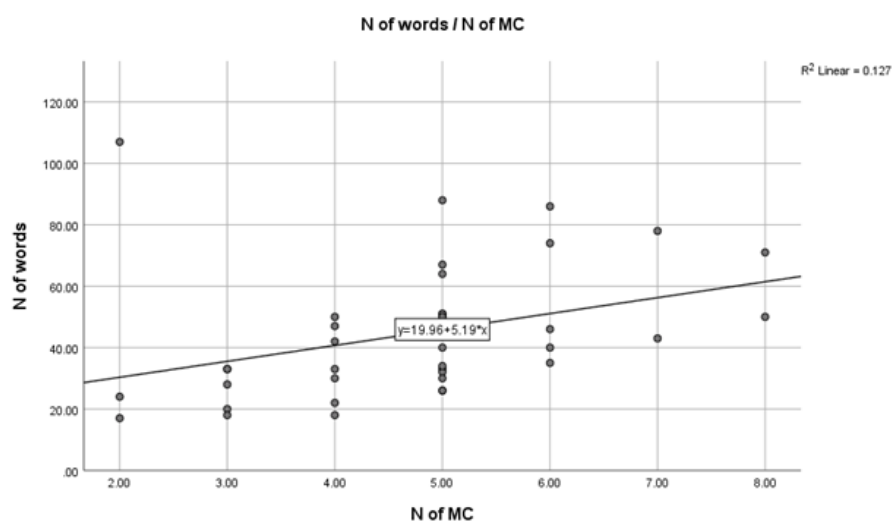

(a)

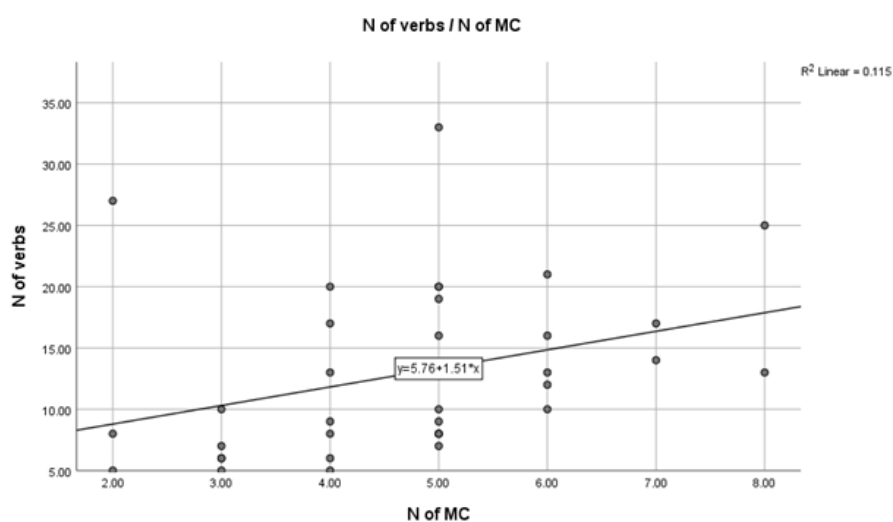

(b)

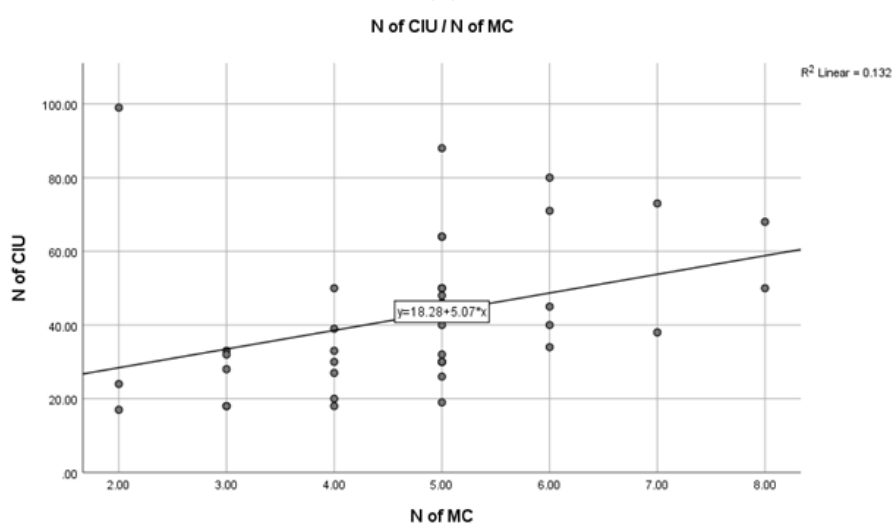

(c)

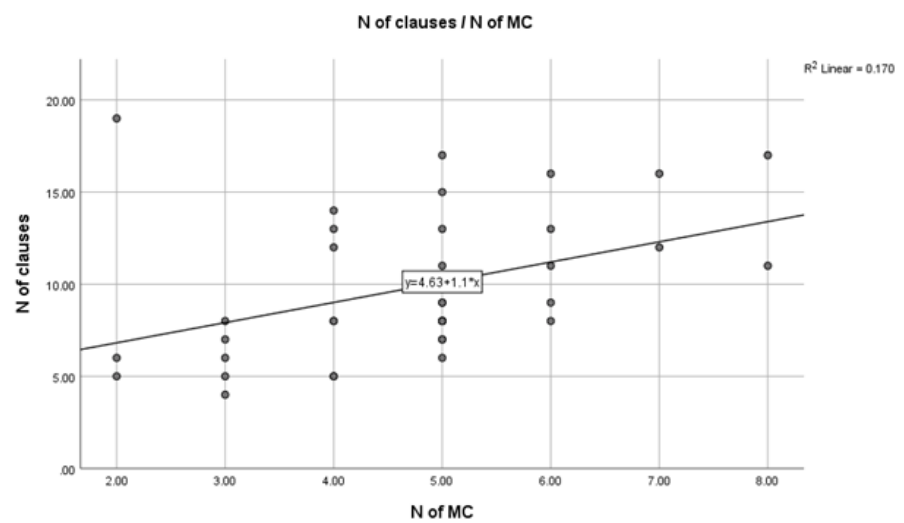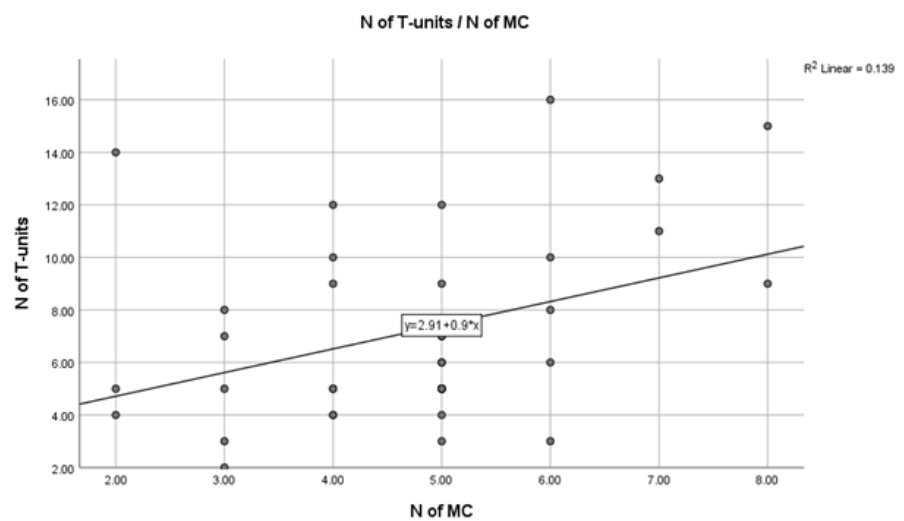

**Figure S3.** (a) Scatterplot for significant correlations; group of HS: N of words/N of MC. (b) Scatterplot for significant correlations; group of HS: N of verbs/N of MC. (c) Scatterplot for significant correlations; group of HS: N of CIU/N of MC. (d) Scatterplot for significant correlations; group of HS: N of clauses/N of MC. (e) Scatterplot for significant correlations; group of HS: N of T-units/N of MC.

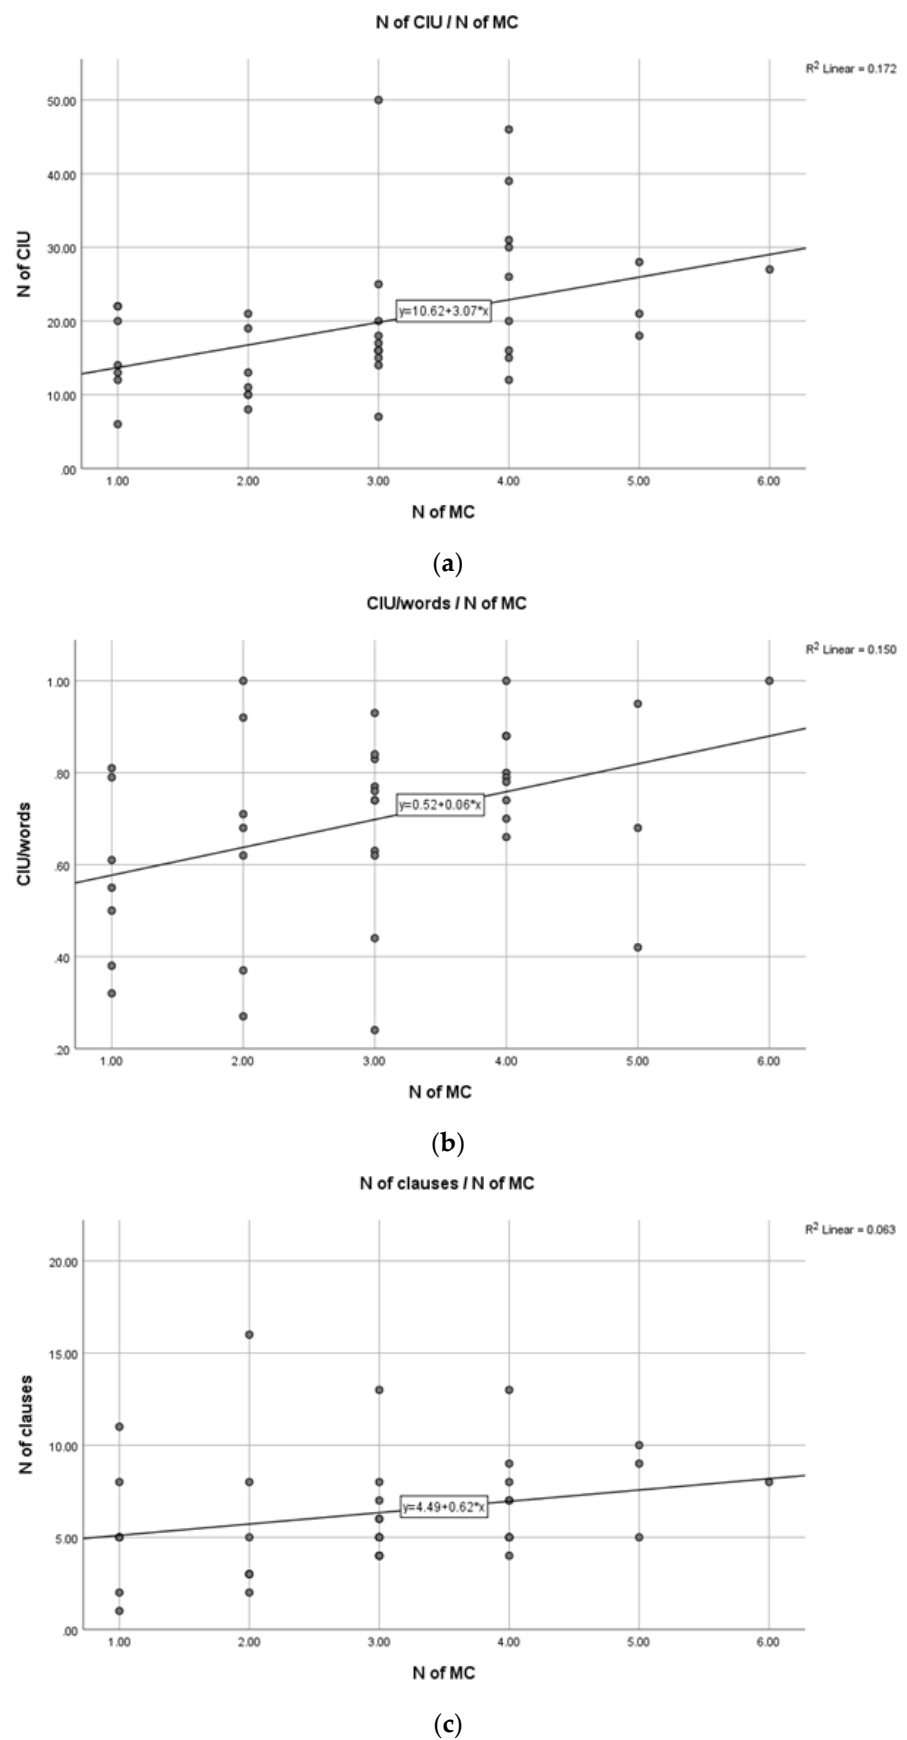

**Figure S4.** (a) Scatterplot for significant correlations; group of PwA: N of CIU/N of MC. (b) Scatterplot for significant correlations; group of PwA: CIU/words/N of MC. (c) Scatterplot for significant correlations; group of PwA: N of clauses/N of MC.
